# Supplementary figures and images for: Direct Targeting of the Raf-MEK-ERK Signaling Cascade Inhibits Neuroblastoma Growth
Source: MDPI journal article supplement (doi:10.3390/curroncol29090512), 2022-09-10

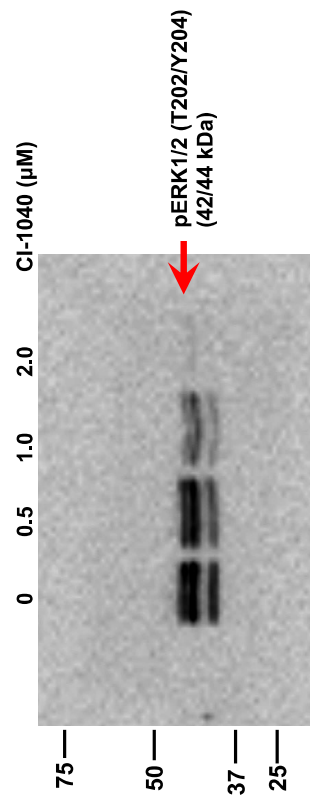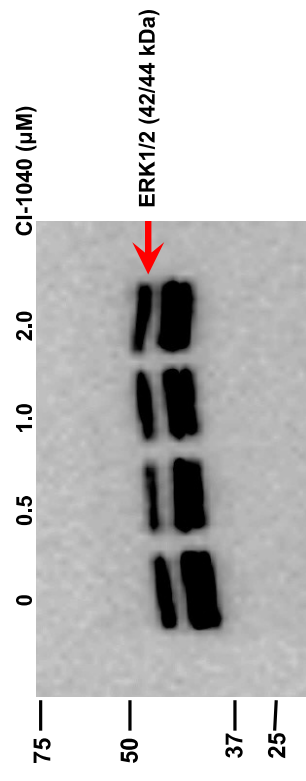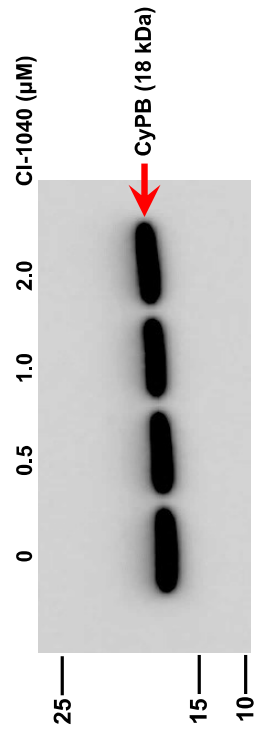

Supplement: s1 [file s1]
